# Supplementary material for: Gestational Caloric Restriction Alters Adipose Tissue Methylome and Offspring’s Metabolic Profile in a Swine Model
Source: MDPI journal article supplement (doi:10.3390/ijms25021128), 2024-01-17
Supplement: s1 [file s1]

**Supplemental Table S3.** Sequence of the primers used and their annealing temperatures.

| Array information |                         |                       | Primers for the validation |                                |                 |                       |
|-------------------|-------------------------|-----------------------|----------------------------|--------------------------------|-----------------|-----------------------|
| CpGs location     | p-value                 | Gene annotation       | Primer                     | Sequence                       | Amplicon length | Annealing temperature |
| chr12:909812      | 9.90 x10 <sup>-5</sup>  | <b><i>FASN</i></b>    | Fw                         | GAGTTTGTGGAGGAAAAGTTTTT        | 505             | 51°C                  |
| chr12:909822      | 1.55 x10 <sup>-4</sup>  |                       | Rv                         | BIOT-CTCCTCTAAAAACAACAAAATCCC  |                 |                       |
| chr12:909834      | 4.64 x10 <sup>-7</sup>  |                       | Seq                        | GAGGTTTTGTGTTGGGAA             |                 |                       |
| chr12:909841      | 1.08 x10 <sup>-4</sup>  |                       |                            |                                |                 |                       |
| chr12:909977      | 3.06 x10 <sup>-12</sup> |                       |                            |                                |                 |                       |
| chr12:909979      | 5.43 x10 <sup>-13</sup> |                       |                            |                                |                 |                       |
| chr12:909982      | 3.73 x10 <sup>-11</sup> |                       |                            |                                |                 |                       |
| chr12:909994      | 1.60 x10 <sup>-11</sup> |                       |                            |                                |                 |                       |
| chr12:910001      | 7.24 x10 <sup>-11</sup> |                       |                            |                                |                 |                       |
| chr12:910003      | 8.87 x10 <sup>-12</sup> |                       |                            |                                |                 |                       |
| chr12:910010      | 1.78 x10 <sup>-12</sup> |                       |                            |                                |                 |                       |
| chr12:62731379    | 2.54 x10 <sup>-5</sup>  | <b><i>SLC5A10</i></b> | Fw                         | AGGGAGTTAGGTTTTTAGAAAGGTT      | 402             | 57°C                  |
| chr12:62731390    | 2.21 x10 <sup>-8</sup>  |                       | Rv                         | BIOT-AAAAATCCCTCACTCACTCATAATT |                 |                       |
| chr12:62731408    | 2.15 x10 <sup>-12</sup> |                       | Seq                        | TTATTGATAATTTATTA              |                 |                       |
| chr12:62731521    | 1.20 x10 <sup>-6</sup>  |                       | Seq                        | GTTTTTAATAAAGTTGAA             |                 |                       |
| chr1:307679069    | 8.92 x10 <sup>-5</sup>  | <b><i>COL5A1</i></b>  | Fw                         | GGTTTTGGGTTAGTAGGATAGAGTAGA    | 206             | 56°C                  |
| chr1:307679087    | 1.38 x10 <sup>-6</sup>  |                       | Rv                         | BIOT-AAACCCCAACCCCTACCCATC     |                 |                       |
|                   |                         |                       | Seq                        | GGGGATTAGGGTTTTG               |                 |                       |
| chr6:58302486     | 1.33 x10 <sup>-3</sup>  | <b><i>PRKCZ</i></b>   | Fw                         | TGAGGATTTTTAGTATTTGGTGTG       | 267             | 56°C                  |
| chr6:58302508     | 4.95 x10 <sup>-4</sup>  |                       | Rv                         | BIOT-CTAAAAACCAACTCCAACAC      |                 |                       |
|                   |                         |                       | Seq                        | GGGTTTTTGAGATTA                |                 |                       |
